# Supplementary material
Source: publisher figshare collection journal article supplement (https://geolsoc.figshare.com/ndownloader/files/26523180)
Supplement: Supplementary file 1 [file 26523180]

**1. Sample Preparation and Analytical Methods**

**Mineral chemistry.**

*Mineral separates*

Mineral separates were prepared after first crushing rocks by steel pestle and mortar, floating off the dust-size fraction by washing in acetone and then oven drying. Single mineral grains were then hand-picked under a binocular microscope, rinsed in an ultrasonic bath and dried to remove any residual traces of adhering dust. Grains were then mounted in epoxy blocks, sliced and polished and carbon coated. All grain mounts were imaged by back-scattered electron scattering under the electron microprobe. This approach allowed a preliminary assessment of compositional heterogeneity. All grains were essentially homogeneous, apart from exsolution lamellae in some pyroxenes. At least 6 electron microprobe analyses per mineral were made and a mean taken for internal standardisation during laser ablation inductively coupled plasma mass spectrometry (LA-ICP-MS).

*Electron microprobe*

Electron microprobe analyses were undertaken in the Analytical Facility of the School of Earth Sciences, Victoria University of Wellington, using a fully automated JEOL-733 Superprobe. Routine operating conditions were accelerating voltage15 kv, Beam Current 1.2 x 10-8 A with a beam diameter of ~ 3 . Full ZAF correction procedures were applied and both natural and synthetic mineral standards were utilised.

*Neutron Activation Analysis*

Several mineral separates (Mt Aldaz) were analysed by routine Instrumental Neutron Activation Analysis methods (Wysoczanski, 1993) at New Mexico Tech, Socorro, New Mexico, USA. Irradiation was carried out in the Research Reactor Facility at University of Missouri. Samples were irradiated for 36 hours in a flux of 2.24 n.cm-2 s-1.

*Laser Ablation Inductively Coupled Plasma Mass Spectrometry*

Laser Ablation Inductively Coupled Mass Spectrometry (LA-ICP-MS) was undertaken in the Research School of Earth Sciences Australian National University using two instruments; a Fisons PQ2 STE and a Hewlett Packard 5400. The laser system at ANU uses an ArF (193 nm, 20 ns pulse width) EXIMER laser operated at 0.58 watts and 115 J and a custom built sample and transport cell. Repeat measurements of the NIST 612 glass standard were used as a monitor for instrumental intensities and BCR-1 was also measured routinely.

43Ca was used as an internal standard, based upon the replicate measurements of CaO by electron microprobe on mineral grains prior to laser ablation analysis.

**Whole rock Sr, Nd, and Pb isotopes**

Sr, Nd and Pb isotopes were measured at the Carnegie Institution, Department of Terrestrial Magnetism using TIMS (Sr and Nd) and MC-ICP-MS (Pb) on splits of the same agate-milled powders used for Os isotopic analyses reported in Handler et al. (2003). Details of the methods employed are contained in Petrone et al. (2003).

# *References*

Handler, M. R., Wysoczanski, R. J. & Gamble, J. A., 2003. Proterozoic lithosphere in Marie Byrd Land, West Antarctica: Re–Os systematics of spinel peridotite xenoliths. *Chemical Geology* 196, 131–145.

# Petrone, C.M., Francalanci, L., Carlson, R.W., Ferrari, L., Conticelli, S., 2003. Unusual coexistence of subduction-related and intraplate-type magmatism: Sr, Nd and Pb isotope and trace element data from the magmatism of the San Pedro–Ceboruco graben (Nayarit, Mexico). *Chemical Geology* 193: 1-24.

Wysoczanski, R.J., 1993. Lithospheric xenoliths from Marie Byrd Land volcanic province, West Antarctica, PhD Thesis, Victoria University of Wellington, 476pp.

**2. Sources of whole rock major element data of continental spinel peridotite xenoliths from off-cratonic regions, used in Figure 8 of the main text.**

Aoki, K. & Shiba, I., 1973. Pyroxenes from lherzolite inclusions of Ichinomegata, Japan. *Lithos* 6:41-51.

Basaltic Volcanism Study Project, 1981. Basaltic Volcanism on the Terrestrial Planets, Pergamon Press, Inc, New York, 1286pp.

Downes, H. & Dupuy, C., 1987. Texture, isotopic and REE variations in spinel peridotite xenoliths, Massif Central, France. *Earth and Planetary Science Letters* 82:121-135.

Downes, H., Embey-Isztin, A. & Thirlwall, M.F., 1992. Petrology and geochemistry of peridotite xenoliths in alkali basalts from the Transdanubian Volcanic Region, West Hungary.  *Contributions to Mineralogy and Petrology* 109: 340-354.

Dupuy, C., Dostal, J., Dautria, J.M. & Girod, M., 1986. Geochemistry of spinel peridotite inclusions in basalts rom Hoggar, Algeria. *Journal of African Earth Sciences* 5 :209-215.

Dupuy, C., Dostal, J. & Bodinier, J.L., 1987. Geochemistry of spinel peridotite inclusions in basalts from Sardinia. *Mineralogical Magazine* 51:561-568.

Francis, D., 1987. Mantle-melt interaction recorded in spinel lherzolite xenoliths from the Alligator Lake Volcanic Complex, Yukon, Canada. *Journal of Petrology* 28:569-597.

Frey, F.A. & Green, D.H., 1974. The mineralogy, geochemistry and origin of lherzolite nclusions in Victorian basanites. *Geochimica et Cosmochimica Acta* 38:1023-1059

Frey,F.A. & Prinz, M., 1978. Ultramafic inclusions from San Carlos, Arizona: petrologic and geochemical data bearing on their petrogenesis. *Earth and Planetary Science Letters* 38:129-176.

Handler, M.R., Bennett, V.C. & Carlson, R.W., 2005. Nd, Sr, and Os isotope systematics in young, fertile spinel peridotite xenoliths from northern Queensland, Australia: A unique view of depleted MORB mantle? *Geochimica et Cosmochimica Acta* 69: 5747-5763.

Ionov, D.A., O’Reilly, S.Y., Genshaft, Y.S. & Kopylova, M.G., 1996. Carbonate-bearing mantle peridotite xenoliths from Spitzbergen: phase relationships, mineral compositions and trace-element residence. *Contributions to Mineralogy and Petrology* 125: 375-392.

Ionov, D.A., Aschchepkov, I., Jagoutz E., 2005. The provenance of fertile off-craton lithospheric mantle: Sr-Nd isotope and chemical composition of garnet and spinel peridotite xenoliths from Vitim, Siberia. *Chemical Geology* 217: 41-75.

Luhr, J.F. & Aranda-Gomez, J.J., 1997. Mexican peridotite xenoliths and tectonic terranes: Correlations among vent location, texture, temperature, pressure and oxygen fugacity. *Journal of Petrology* 38: 1075-1112.

Nixon, P.H. (ed). 1987. Mantle Xenoliths. Wiley, Chichester. 844pp.

O’Reilly, S.Y. & Griffin, W.L., 1988 Mantle metasomatism beneath western Victoria, Australia: I Metasomatic processes in Cr-diopside lherzolites. *Geochimica et Cosmochimica Acta.* 52:433-447

Roden, M.R., Irving, A.J. & Murthy, V.R., 1988 Isotopic and trace element compositions of the upper mantle betneath a young continental rift: Results from Kilbourne Hole, New Mexico. *Geochimica et Cosmochimica Acta* 52:461-473.

Rudnick, R.L., McDonough, W.F. & Chappell, B.W., 1993. Carbonatite metasomatism in the northern Tanzanian mantle: petrographic and geochemical characteristics. *Earth and Planetary Science Letters* 114: 463-475.

Rudnick, R.L., Gao, S., Ling, W.-l., Liu, Y.-s. & McDonough, W.F., 2004. Petrology and geochemistry of spinel peridotite xenoliths from Hannuoba and Qixia, North China craton. *Lithos* 77: 609-637.

Song, Y. & Frey, F.A., 1984. Geochemistry of peridotite xenoliths in basalt from Hannuoba, Eastern China: Implications for subcontinental mantle heterogeneity. *Geochimica et Cosmochimica Acta* 53: 97-113.

Stolz, A.J. & Davies, G.R., 1988. Chemical and isotopic evidence from spinel lherzolite xenoliths for episodic metasomatism of the upper mantle beneath southeast Australia. *Journal of Petrology,* Special Volume 1: 303-330.

Stosch H.-G. & Seck H.A., 1980. Geochemistry and mineralogy of two spinel peridotite suites from Dreiser Weiher, West Germany. *Geochimica et Cosmochimica Acta* 44: 457-470.

Yaxley, G.M., Crawford, A.J. & Green, D.H., 1991. Evidence for carbonatite metasomatism in spinel peridotite xenoliths from western Victoria, Australia. *Earth and Planetary Science Letters* 107: 305-317.
